# Supplementary material for: Biosphere-atmosphere related processes influence trace-gas and aerosol satellite-model biases
Source: Copernicus journal article supplement (doi:10.5194/egusphere-2024-4014), 2025-01-17
Supplement: Supplementary file 1 [file egusphere-2024-4014-supplement.pdf]

## Supplementary information for “Biosphere-atmosphere related processes influence trace-gas and aerosol satellite-model biases.”

### **S1 – BVOC emission factors**

Recent work has identified that expansion of the number of plant functional types (PFTs) in the UK Earth System Model (UKESM) may have resulted in inaccurate assignment of isoprene and monoterpene emission factors (IEF and TEF, respectively) to the new PFTs (Weber et al. 2023). Table S1. illustrates the original and updated isoprene and monoterpene emission factors used in the study. In general, the new IEF and TEF values result in increased BVOC emissions from broadleaf forests and deciduous shrubs, while decreases occur elsewhere. The change is particularly substantial for C3 and C4 crop and pasture PFTs, which see a factor of 500 decrease.

*Table S1. Emission factors ( $\mu\text{gC g}_{\text{dw}}^{-1} \text{hr}^{-1}$ ) used for calculating emissions of isoprene (IEF) and (mono)terpenes (TEF) in iBVOC. The original and new EFs are marked by the subscripts ‘orig’ and ‘new’, respectively. The red font highlights EFs, which are greater than the original values, while a decrease in the EF is marked by the use of a blue font.*

| Plant functional type               | IEF <sub>orig</sub> | IEF <sub>new</sub> | TEF <sub>orig</sub> | TEF <sub>new</sub> |
|-------------------------------------|---------------------|--------------------|---------------------|--------------------|
| Broadleaf deciduous trees           | 35                  | 72.3               | 1.33                | 2.7                |
| Broadleaf evergreen tropical trees  | 24                  | 38.1               | 1.2                 | 1.8                |
| Broadleaf evergreen temperate trees | 16                  | 54.4               | 1.2                 | 1.3                |
| Needleleaf deciduous trees          | 8                   | 0.01               | 2.40                | 1.8                |
| Needleleaf evergreen trees          | 8                   | 6.3                | 2.40                | 0.9                |
| C3 grass                            | 16                  | 11.6               | 0.80                | 0.02               |
| C3 crop                             | 5                   | 0.01               | 0.20                | 0.02               |
| C3 pasture                          | 5                   | 0.01               | 0.20                | 0.02               |
| C4 grass                            | 24                  | 2.20               | 1.70                | 0.02               |
| C4 crop                             | 5                   | 0.01               | 0.20                | 0.02               |
| C4 pasture                          | 5                   | 0.01               | 0.20                | 0.02               |
| Shrub deciduous                     | 10                  | 35.2               | 1.25                | 1.3                |
| Shrub evergreen                     | 20                  | 10.2               | 1.00                | 0.6                |

### **S2 – Reaction rate updates**

The Arrhenius expression is used to calculate the rate coefficient for bimolecular reactions in the United Kingdom Chemistry and Aerosol (UKCA) model:

$$k = k_0 \left( \frac{T}{300} \right)^\alpha \exp\left( \frac{-\beta}{T} \right),$$

where  $k_0$  is the pre-exponential factor,  $T$  is the temperature,  $\alpha$  is the exponent for the  $(T/300)$  temperature dependence and  $\beta$  represents the Arrhenius activation energy divided by the gas constant (O’Connor et al. 2014). The values of the coefficients vary depending on the reaction and are periodically updated, alongside the fractions of products produced in those reactions, to align with new published data (e.g. IUPAC Task Group on Atmospheric Chemical Kinetic Data Evaluation, <http://iupac.pole-ether.fr/>, last access: 25/09/2024, and Burkholder et al. (2019)).

Table S2. summarises recent updates to the coefficients used to calculate the bimolecular reaction rate coefficients. The reactions shown here are not an exhaustive list of all the updates, as other

reaction types (e.g., termolecular) are also affected, but are meant to provide an overview of the changes and include key BVOC reactions. The impacts of these updates are studied in *Exp\_RR*.

Table S2. Updates to values used to calculate the rate coefficient for bimolecular reactions in the Strat-Trop scheme.

| Reaction                            | k0       |          | alpha |     | beta |       | other comments | Diff at given T |       |
|-------------------------------------|----------|----------|-------|-----|------|-------|----------------|-----------------|-------|
|                                     | old      | new      | old   | new | old  | new   |                | 276 K           | 283 K |
| C5H8+O3->HO2+OH                     | 3.33E-15 | 3.30E-15 | 0     | 0   | 1995 | 2000  |                | 97%             | 97%   |
| C5H8+O3->MACR+HCHO+MACR<br>O2+MeCO3 | 3.33E-15 | 3.30E-15 | 0     | 0   | 1995 | 2000  |                | 97%             | 97%   |
| C5H8+O3->MeOO+HCOOH+CO+<br>H2O2     | 3.33E-15 | 3.30E-15 | 0     | 0   | 1995 | 2000  |                | 97%             | 97%   |
| C5H8+OH->ISO2                       | 2.70E-11 | 3.00E-11 | 0     | 0   | -390 | -390  |                | 111%            | 111%  |
| C5H8+NO3->ISON                      | 3.15E-12 | 2.95E-12 | 0     | 0   | 450  | 450   |                | 94%             | 94%   |
| C10H16+O3->sec_org                  | 1.01E-15 | 8.22E-16 | 0     | 0   | 732  | 640   |                | 114%            | 113%  |
| C10H16+OH->sec_org                  | 1.20E-11 | 1.34E-11 | 0     | 0   | -444 | -410  |                | 99%             | 99%   |
| C10H16+NO3->sec_org                 | 1.19E-12 | 1.20E-12 | 0     | 0   | -925 | -490  |                | 21%             | 22%   |
| BrO+BrO-> Br+Br+O2                  | 2.40E-12 | 1.50E-12 | 0     | 0   | -40  | -230  |                | 124%            | 122%  |
| CFCl3+O(1D)-> Cl+Cl+ClO             | 2.30E-10 | 2.07E-10 | 0     | 0   | 0    | 0     |                | 90%             | 90%   |
| CF2Cl2+O(1D)-> Cl+ClO               | 1.40E-10 | 1.20E-10 | 0     | 0   | 0    | -25   |                | 94%             | 94%   |
| Cl+CH4->HCl+MeOO                    | 6.60E-12 | 7.10E-12 | 0     | 0   | 1240 | 1270  |                | 96%             | 97%   |
| Cl+H2->HCl+H                        | 3.90E-11 | 3.05E-11 | 0     | 0   | 2310 | 2270  |                | 90%             | 90%   |
| Cl+HO2->ClO+OH                      | 4.10E-11 | 3.60E-11 | 0     | 0   | 450  | 375   |                | 115%            | 114%  |
| ClO+MeOO->Cl+HCHO+HO2               | 3.30E-12 | 1.80E-12 | 0     | 0   | 115  | 600   |                | 9%              | 10%   |
| ClO+NO3->Cl+O2+NO2                  | 4.60E-13 | 4.70E-13 | 0     | 0   | 0    | 0     |                | 102%            | 102%  |
| EtOO+NO->MeCHO+HO2+NO2              | 2.55E-12 | 2.60E-12 | 0     | 0   | -380 | -365  |                | 97%             | 97%   |
| H+NO2->OH+NO                        | 4.00E-10 | 1.35E-10 | 0     | 0   | 340  | 0     |                | 116%            | 112%  |
| HO2+EtCO3->O2+EtCO3H                | 4.40E-13 | 1.76E-13 | 0     | 0   | -980 | -1040 |                | 50%             | 49%   |
| HO2+EtCO3->O3+EtCO2H                | 7.80E-14 | 6.45E-14 | 0     | 0   | -980 | -1040 |                | 103%            | 102%  |
| HO2+MeCO3->MeCO2H+O3                | 7.80E-14 | 2.25E-13 | 0     | 0   | -980 | -730  |                | 117%            | 119%  |
| HO2+MeCO3->MeCO3H                   | 2.13E-13 | 6.40E-13 | 0     | 0   | -980 | -730  |                | 121%            | 124%  |
| HO2+MeCO3->OH+MeOO                  | 2.29E-13 | 8.65E-13 | 0     | 0   | -980 | -730  |                | 153%            | 156%  |
| HO2+MeCOCH2OO->MeCOCH2O<br>OH       | 9.00E-12 | 8.60E-13 | 0     | 0   | 0    | -700  |                | 121%            | 113%  |
| HO2+NO->OH+NO2                      | 3.30E-12 | 3.44E-12 | 0     | 0   | -270 | -260  |                | 101%            | 101%  |
| HO2+O3->OH+O2                       | 2.03E-16 | 1.00E-14 | 4.57  | 0   | -693 | 490   |                | 99%             | 98%   |
| MeBr+Cl->Br+HCl                     | 1.40E-11 | 1.46E-11 | 0     | 0   | 1030 | 1040  |                | 101%            | 101%  |
| Mebr+OH->Br+H2O                     | 2.35E-12 | 1.42E-12 | 0     | 0   | 1300 | 1150  |                | 104%            | 103%  |
| MeCO3+NO->MeOO+CO2+NO2              | 7.50E-12 | 8.10E-12 | 0     | 0   | -290 | -270  |                | 100%            | 101%  |
| MeCOCH2OO<br>+NO->MeCO3+HCHO+NO2    | 2.70E-12 | 2.90E-12 | 0     | 0   | -360 | -300  |                | 86%             | 87%   |

|                              |          |          |   |   |      |      |                               |      |      |
|------------------------------|----------|----------|---|---|------|------|-------------------------------|------|------|
| MeOO+MeOO->HO2+HO2+HCHO+HCHO | 1.03E-13 | 1.03E-13 | 0 | 0 | -365 | -390 |                               | 109% | 109% |
| MeOO+MeOO->MeOH+HCHO         | 1.03E-13 | 1.03E-13 | 0 | 0 | -365 | -390 |                               | 109% | 109% |
| MeOO+NO->HO2+HCHO+NO2        | 2.30E-12 | 2.80E-12 | 0 | 0 | -360 | -300 |                               | 98%  | 98%  |
| MeOO+NO->MeONO2              | 2.30E-15 | 8.97E-15 | 0 | 0 | -360 | -360 |                               | 390% | 390% |
| N+O2->NO+O(3P)               | 1.50E-11 | 3.30E-12 | 0 | 0 | 3600 | 3150 |                               | 112% | 108% |
| NO+ISO2->ISON                | 1.12E-13 | 9.68E-13 | 0 | 0 | -360 | 0    |                               | 235% | 242% |
| NO+ISO2->NO2+MACR+HCHO+HO2   | 2.43E-12 | 7.83E-12 | 0 | 0 | -360 | 0    |                               | 87%  | 90%  |
| NO+MACRO2->MGLY+HCHO+HO2     | 1.27E-12 | 1.35E-12 | 0 | 0 | -360 | -360 |                               | 106% | 106% |
| NO+MACRO2->NO2+MeCO3+HACET   | 1.27E-12 | 1.25E-12 | 0 | 0 | -360 | -360 |                               | 98%  | 98%  |
| NO+NO3->NO2+NO2              | 1.50E-11 | 1.70E-11 | 0 | 0 | -170 | -125 |                               | 96%  | 97%  |
| NO2+NO3->NO+NO2+O2           | 4.50E-14 | 4.35E-14 | 0 | 0 | 1260 | 1340 |                               | 72%  | 73%  |
| no3+hcho->hono2+ho2+co       | 2.00E-12 | 5.80E-16 | 0 | 0 | 2440 | 0    |                               | 200% | 161% |
| NO3+MGLY->MeCO3+CO+HONO2     | 3.36E-12 | 5.00E-16 | 0 | 0 | 1860 | 0    |                               | 13%  | 11%  |
| O(1D)+CH4->HCHO+H2           | 9.00E-12 | 8.75E-12 | 0 | 0 | 0    | 0    |                               | 97%  | 97%  |
| O(1D)+CH4->HCHO+HO2+HO2      | 3.45E-11 | 3.50E-11 | 0 | 0 | 0    | 0    |                               | 101% | 101% |
| O(1D)+HBr->OH+Br             | 1.20E-10 | 9.00E-11 | 0 | 0 | 0    | 0    |                               | 75%  | 75%  |
| O(1D)+HCl->H+ClO             | 3.60E-11 | 3.30E-11 | 0 | 0 | 0    | 0    |                               | 92%  | 92%  |
| O(1D)+HCl->O(3P)+HCl         | 1.35E-11 | 1.80E-11 | 0 | 0 | 0    | 0    |                               | 133% | 133% |
| O(1D)+HCl->OH+Cl             | 1.01E-10 | 9.90E-11 | 0 | 0 | 0    | 0    |                               | 98%  | 98%  |
| O(1D)+N2O->N2+O2             | 4.60E-11 | 4.64E-11 | 0 | 0 | -20  | -20  |                               | 101% | 101% |
| O(1D)+N2O->NO+NO             | 7.30E-11 | 7.26E-11 | 0 | 0 | -20  | -20  |                               | 99%  | 99%  |
| O(3P)+HO2->OH+O2             | 2.70E-11 | 3.00E-11 | 0 | 0 | -224 | -200 |                               | 102% | 102% |
| O(3P)+NO2->NO+O2             | 5.10E-12 | 5.30E-12 | 0 | 0 | -210 | -200 |                               | 100% | 100% |
| O(3P)+NO3->O2+NO2            | 1.70E-11 | 1.30E-11 | 0 | 0 | 0    | 0    |                               | 76%  | 76%  |
| O3+MACR->MGLY+HCOOH+HO2+CO   | 2.13E-16 | 1.23E-15 | 0 | 0 | 1520 | 2100 |                               | 71%  | 74%  |
| O3+MACR->OH+MeCO3            | 2.13E-16 | 1.68E-16 | 0 | 0 | 1520 | 2100 |                               | 10%  | 10%  |
| OH+C3H8->H2O+EtOO            | 6.90E-12 | 7.66E-12 | 0 | 0 | 1000 | 1020 |                               | 103% | 103% |
| OH+C3H8->i-PrOO+H2O          | 7.60E-12 | 6.76E-12 | 0 | 0 | 585  | 630  |                               | 76%  | 76%  |
| OH+C3H8->n-PrOO+H2O          | 7.60E-12 | 2.43E-12 | 0 | 0 | 585  | 630  |                               | 27%  | 27%  |
| OH+CO->H+CO2                 | 1.44E-13 | 1.85E-13 | 0 | 0 | 0    | 65   |                               | 102% | 102% |
| OH+H2->H2O+HO2               | 2.80E-12 | 2.80E-12 | 0 | 0 | 1800 | 1800 | products changed to H2O+H     | 100% | 100% |
| OH+HACET->MGLY+HO2           | 1.60E-12 | 2.00E-12 | 0 | 0 | -305 | -320 |                               | 132% | 132% |
| OH+HCHO->H2O+HO2+CO          | 5.40E-12 | 5.50E-12 | 0 | 0 | -135 | -125 |                               | 98%  | 98%  |
| OH+HCOOH->HO2                | 4.50E-13 | 4.00E-13 | 0 | 0 | 0    | 0    | products changed to CO2+H2O+H | 89%  | 89%  |
| OH+HO2NO2->H2O+NO2+O2        | 3.20E-13 | 4.50E-13 | 0 | 0 | -690 | -610 |                               | 105% | 106% |

|                                    |          |          |     |   |       |      |                                           |      |      |
|------------------------------------|----------|----------|-----|---|-------|------|-------------------------------------------|------|------|
| OH+HONO->H2O+NO2                   | 2.50E-12 | 3.00E-12 | 0   | 0 | -260  | -250 |                                           | 116% | 116% |
| OH+HONO2->H2O+NO3                  | 2.40E-14 | 3.70E-14 | 0   | 0 | -460  | -240 |                                           | 69%  | 71%  |
| OH+MeCHO->H2O+MeCO3                | 4.70E-12 | 4.63E-12 | 0   | 0 | -345  | -350 |                                           | 100% | 100% |
| OH+MeCO2H->MeOO                    | 8.00E-13 | 3.15E-14 | 0   | 0 | 0     | -920 |                                           | 110% | 102% |
| OH+MeOH->HO2+HCHO                  | 2.85E-12 | 2.90E-12 | 0   | 0 | 345   | 345  |                                           | 102% | 102% |
| OH+MeONO2->HCHO+NO2+H2O            | 4.00E-13 | 8.00E-13 | 0   | 0 | 845   | 1000 |                                           | 114% | 116% |
| OH+MeOOH->H2O+HCHO+OH              | 2.12E-12 | 1.10E-12 | 0   | 0 | -190  | -200 |                                           | 54%  | 54%  |
| OH+MeOOH->H2O+MeOO                 | 1.89E-12 | 2.70E-12 | 0   | 0 | -190  | -200 |                                           | 148% | 148% |
| OH+NO3->HO2+NO2                    | 2.20E-11 | 2.00E-11 | 0   | 0 | 0     | 0    |                                           | 91%  | 91%  |
| OH+OH->H2O+O(3P)                   | 6.31E-14 | 1.80E-12 | 2.6 | 0 | -945  | 0    |                                           | 115% | 118% |
| i-PrOO+NO3->Me2CO+HO2+NO2          | 2.70E-12 | 2.20E-12 | 0   | 0 | -360  | 0    |                                           | 22%  | 23%  |
| n-PrOO+NO3->EtCHO+HO2+NO2          | 2.70E-12 | 2.30E-12 | 0   | 0 | -360  | 0    |                                           | 23%  | 24%  |
| CS2+O(3P)->COS+SO2+CO              | 3.20E-11 | 3.30E-11 | 0   | 0 | 650   | 650  | products updated<br>to CO+SO2+SO2         | 103% | 103% |
| CS2+OH->COS+SO2                    | 1.25E-16 | 2.00E-15 | 0   | 0 | -4550 | 0    |                                           | 0%   | 0%   |
| DMS+OH->SO2                        | 1.20E-11 | 1.20E-11 | 0   | 0 | 260   | 280  |                                           | 93%  | 93%  |
| DMS+NO3->SO2                       | 1.90E-13 | 1.90E-13 | 0   | 0 | -500  | -530 |                                           | 111% | 111% |
| DMSO+OH->SO2+MSA                   | 5.80E-11 | 6.10E-12 | 0   | 0 | 0     | -800 |                                           | 191% | 178% |
| H2S+O(3P)->OH+SO2                  | 9.20E-12 | 9.20E-12 | 0   | 0 | 1800  | 1800 | products updated<br>to<br>OH+SO2+OH+O(3P) | 100% | 100% |
| H2S+OH->SO2+H2o                    | 9.20E-12 | 9.20E-12 | 0   | 0 | 75    | -100 |                                           | 189% | 186% |
| COS+OH->CO2+SO2                    | 1.10E-13 | 7.20E-14 | 0   | 0 | 1200  | 1070 |                                           | 105% | 104% |
| ISO2+RO2->MACR+HCHO+HO2            | 1.67E-12 | 1.26E-12 | 0   | 0 | 0     | 0    |                                           | 75%  | 75%  |
| MACRO2+RO2->HACET+MGly+H<br>CHO+CO | 8.37E-13 | 2.10E-13 | 0   | 0 | 0     | 0    |                                           | 25%  | 25%  |
| MACRO2+RO2->HO2                    | 8.37E-13 | 2.10E-13 | 0   | 0 | 0     | 0    |                                           | 25%  | 25%  |

### **S3 - Isoprene vertical distribution in the model for comparison against CrIS retrieval**

Satellite retrievals of atmospheric trace gases are not uniformly sensitive across different layers of the atmosphere. Figure S1 shows the average vertical distribution of isoprene volume mixing ratios in the troposphere in South America, which highlights how most of the trace gas simulated by the model is found in the lower troposphere (>800 hPa). The averaging kernel for an example satellite retrieval of isoprene from within the same region shows that the retrievals are sensitive to the lower troposphere, particularly at around 900hPa (Fu et al., 2019). Therefore, despite the lack of detailed information on the vertical sensitivity of the observational data used in the study, we suggest using the satellite isoprene dataset is appropriate for identifying total column model biases.

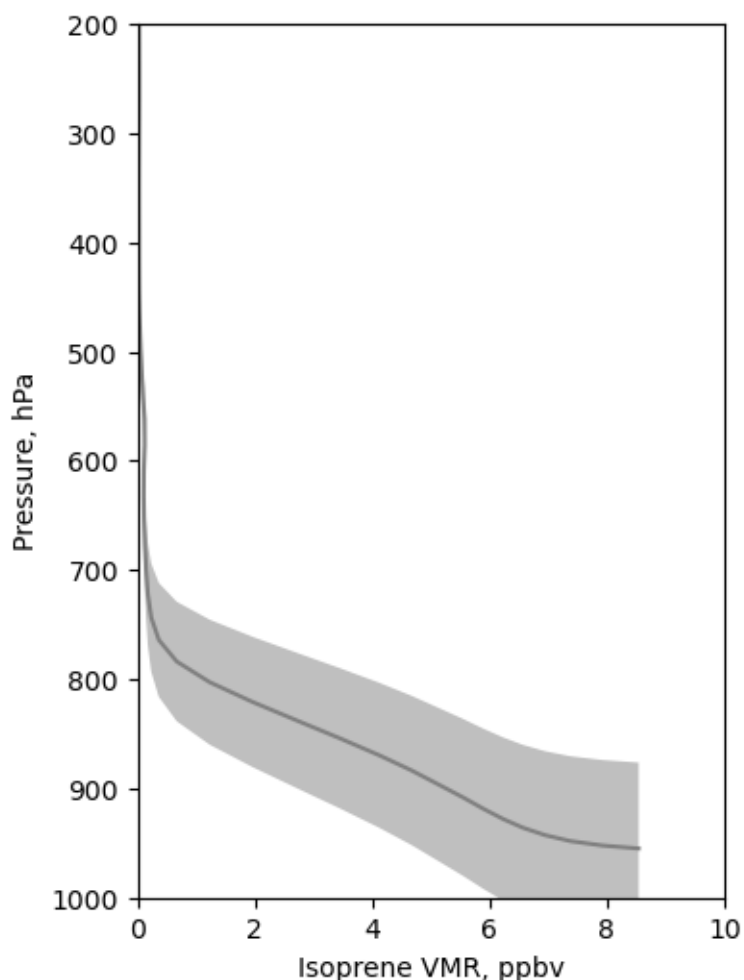

Figure S1. Mean vertical distribution of isoprene (VMR) in South America (0 to 15 degrees S, 60 to 80 degrees W) in September 2014. Cf isoprene retrieval and averaging kernels in Fu et al. (2019), Figure 4.

#### **S4 – Impacts of using different time profiles for model data analysis for satellite-model comparison**

Isoprene emissions and the concentrations of oxidants in the atmosphere are known to have daily cycles. Consequently, isoprene total column values at a given location will fluctuate daily, with implications for comparing model output to satellite observations. Figure S2 illustrates the difference between mean total column isoprene values calculated for February to December 2012 using two sets of model outputs. The first set is based on data that has been output every 6 hours and subsequently filtered to use those outputs closest in time to the satellite overpass on a given day at a given location before the monthly mean value is calculated. A second simulation output daily data within one hour of the satellite overpass time of 13:30 LT. For this purpose, 12 longitudinal domains were created, which enabled the output of data at 13:30 LT in the middle and at the edges of the domain. Linear interpolation was used to obtain values for approximately 13:30 LT for the cells in between. These data form the basis of the second set of monthly mean data.

A comparison of model outputs for December, March, June and September (Fig. S2 d-g) shows the areas primarily affected by the choice of time profile remain relatively consistent throughout the year. In the north and northwest of South America the values are greater by  $>1.2 \times 10^{16}$  molec.  $\text{cm}^{-2}$

when the 13:30 LT outputs are used. In the tropical and southern hemisphere Africa differences are most widespread in December and March. The annual mean difference remains  $<1 \times 10^{16}$  molec.  $\text{cm}^{-2}$ . In northern Australia, parts of tropical east Asia and along the Andes, the isoprene columns are greater when the 6 hourly method is used, but only for part of the year.

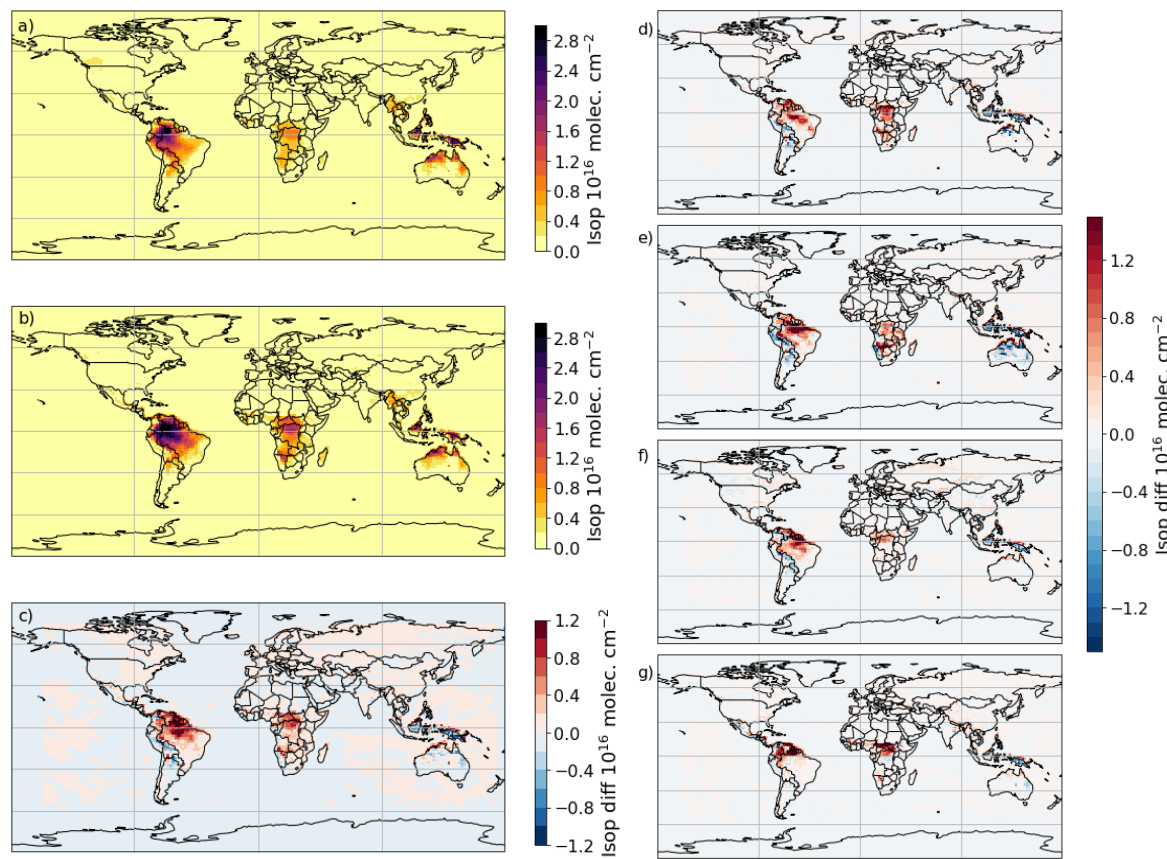

Figure S2. Comparison of the temporal means (February - December 2012) of the model output: data closest to satellite overpass time selected from 6 hourly model output (a) and model output for 13:30 LT (b). The difference (13:30 LT data – 6 hourly data) of the temporal means is presented in panel (c). Differences for December, March, June and September 2012 are presented in panels d, e, f and g, respectively.

### **S5 – Impact of dimethyl sulphide chemistry in CS2 on AOD**

The comparison of seasonal AOD average values between the model experiment using the more complex CS2 mechanism and the baseline shows a widespread decrease in AOD values over the Southern Ocean in SON and DJF. We run an additional 2-year experiment, which isolates the impact of the dimethyl sulphide (DMS) chemistry representation on AOD values. This experiment uses the CS2 mechanism, except for the DMS reactions, which match those used in ST. Figure S3 shows the impacts on annual average AOD for 2006. When compared to the baseline, the substantial increase over China ( $> +0.045$ ), alongside smaller magnitude increases above other regions of anthropogenic emissions, is highlighted. However, the Southern Ocean decrease does not occur. On the other hand, comparing the CS2 with ST DMS results to the original CS2 AOD shows an increase in Southern Ocean AOD by 0.005 to 0.015. Consequently, we attribute the difference in Southern Ocean AOD between the CS2 and ST mechanism to their representations of DMS chemistry.

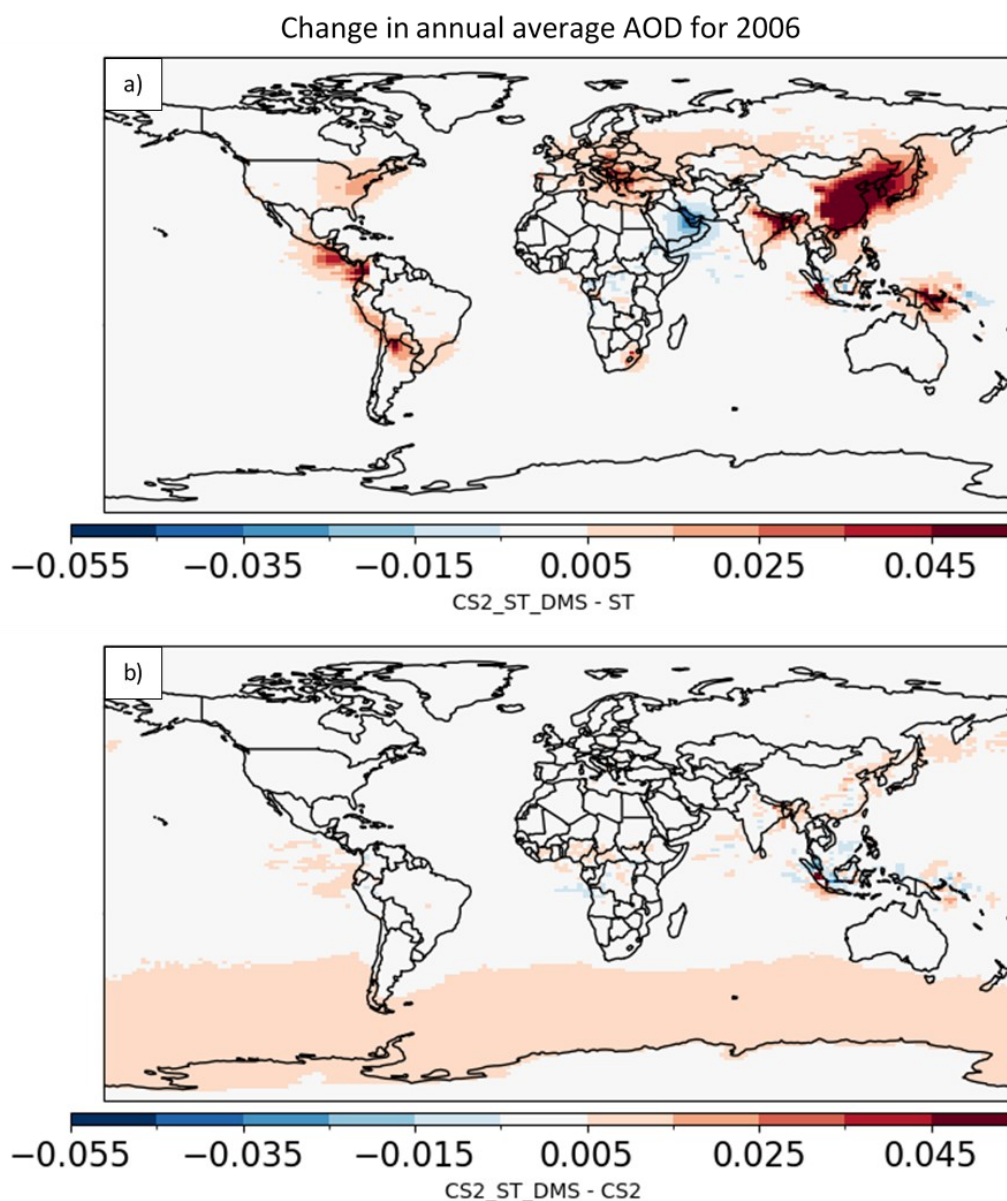

Figure S3. Difference in average AOD values for 2006 when the CS2 mechanism is used with the ST DMS scheme compared to the baseline (CS2\_ST\_DMS - ST, panel a) and the standard CS2 set up (CS2\_ST\_DMS - CS2, panel b).

### **S6 – Binary homogenous nucleation rate in the baseline and percentage change in Exp CS2**

Binary homogenous nucleation preferentially occurs in UKESM in the upper troposphere (Fig. S4). Changes to the concentrations of various oxidants and other chemical species driven by the more complex chemistry of the CRI-Strat 2 (CS2) mechanism can influence the rate of nucleation. We find that the nucleation rates in the upper troposphere, where most of the nucleation takes place, decrease by up to 40% compared to the Strat-Trop mechanism. Despite increases elsewhere, the lower rates in the key upper tropospheric regions result in global decrease in binary homogenous nucleation when the CS2 mechanism is used.

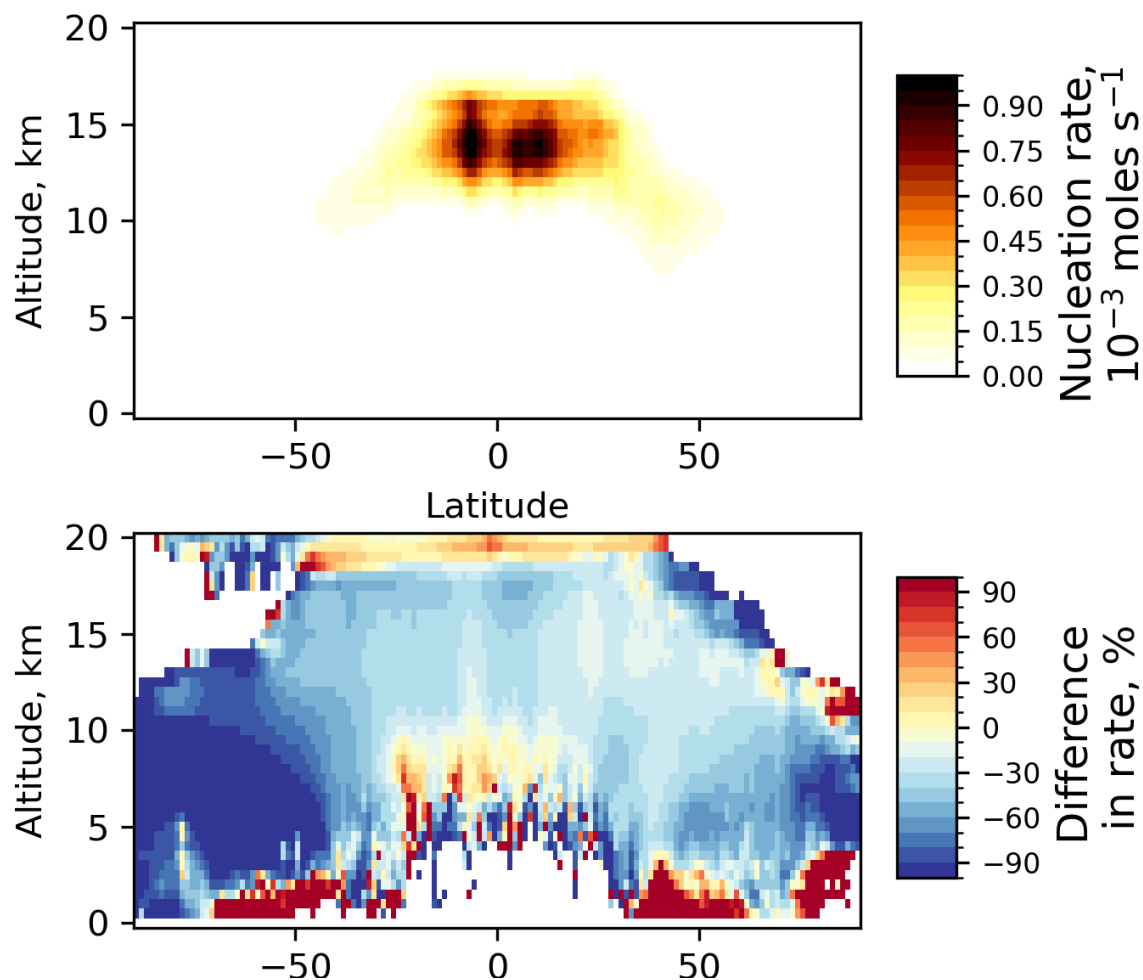

Figure S4. Binary homogenous nucleation rate (2012-2014 average) depending on and latitude and altitude in the baseline model (top). Difference in the binary homogenous nucleation as a percentage of the baseline rate, when the CS2 mechanism is used (bottom).

### **S7 – Aerosol size distribution in CS2**

Figure S5a shows how the global aerosol size distribution (inclusive of all types of aerosols and the whole atmosphere) responds to the processes described above. Globally, the decrease is most pronounced (<30%) for small particle sizes (Fig. S5b). The decrease in the accumulation mode, which is greater than 20% for some aerosol radii, is substantial enough to influence the accumulation-mode-sensitive AOD values. The aerosol numbers in the coarse mode are not substantially affected. The AOD response in East Asia is unusual, as values tend to increase compared to the baseline when the CS2 mechanism is used (Fig 6i). Isolating the changes in aerosol over the East Asia region, as defined by the Task Force on Hemispheric Transport of Air Pollution (TF HTAP), shows there are some positive changes for large particle numbers (Fig. S5c,d). The positive AOD change affects only part of the East Asia HTAP region, therefore a clearer signal may be found, if the data were further subset.



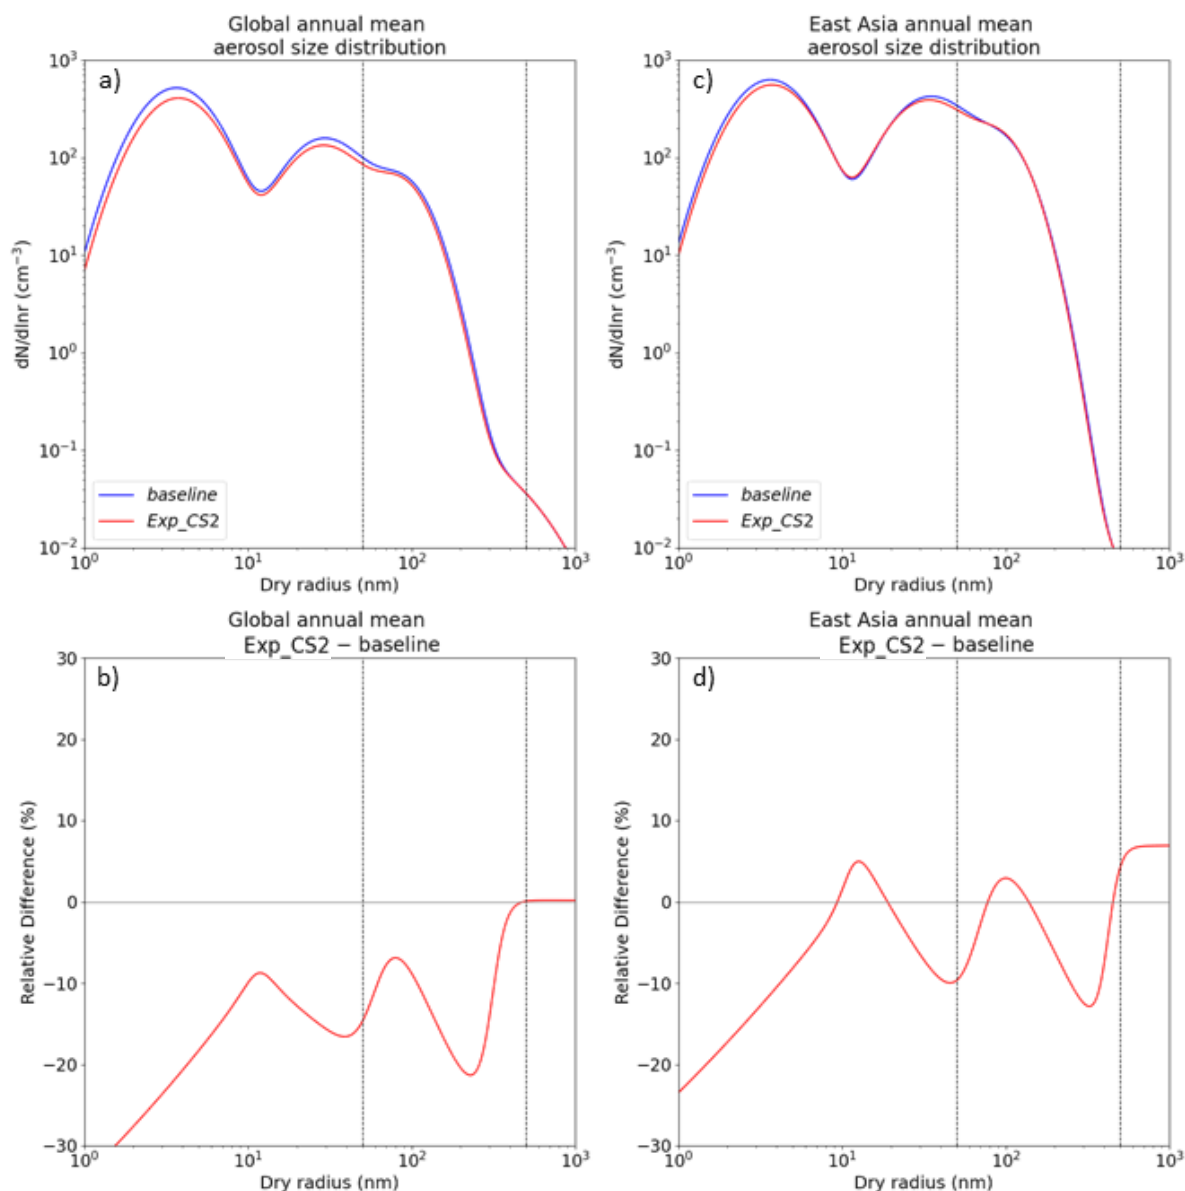

Figure S5. The 2006-2014 aerosol size distribution (blue line) in the baseline and when the more complex CS2 mechanism is used (red line) globally (a) and the difference between them (CS2-baseline) (b), as well as the same information for east Asia (c,d, using the Task Force on Hemispheric Transport of Air Pollution (TF HTAP) region definition). The vertical dashed lines indicate the typical range of aerosol radii within the accumulation mode.

## S8 – Changes in aerosol mass and number depending on mode

Figure S6 shows the changes in aerosol mass and number separated by aerosol mode and the studied process(es). We find that as the total aerosol number increases, the total aerosol mass also tends to rise (Fig. S6 left). One exception is the accumulation mode, where aerosol mass decreases for all processes compared to the baseline, but the aerosol number increases when either of BLN or Sec\_Org<sub>i</sub> formation are included. In most cases, the total aerosol mass and number increase for the Aitken insoluble mode compared to the baseline (by <30%), while the total aerosol mass decreases for the accumulation mode (by <20%). This suggests that the decrease in AOD values when BLN and Sec\_Org<sub>i</sub> formation are included is driven by a shift in the aerosol size distribution, with less mass in

the accumulation mode in favour of some of the smaller modes as noted in section 3.3. The more complex chemistry scheme in isolation produces a different effect as it results in lower aerosol mass and number for all aerosol modes except for the coarse mode. We note that significant changes in the organic matter aerosols do not always translate to substantial differences in total aerosol mass. This is particularly visible for the coarse mode mass, which decreases by at least 10% for organic matter, but is unchanged for total aerosol (Fig. S6 right).

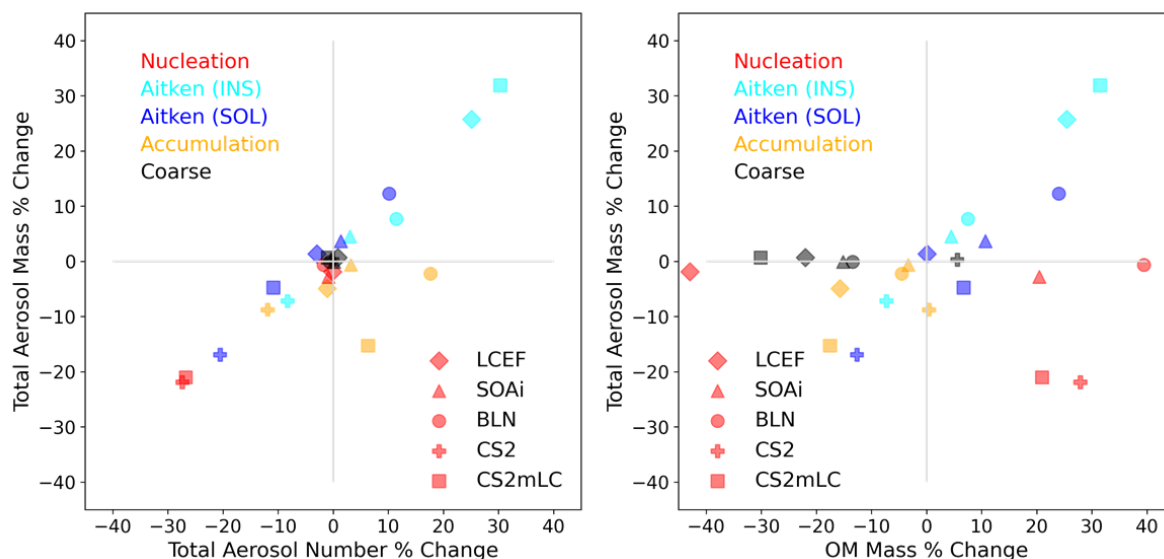

Figure S6. Percentage change from the baseline in total aerosol mass and number (left) and total aerosol mass and OM aerosol mass (right) in different aerosol size modes for four experiments.

### **S9 – Impact of applying averaging kernels onto model HCHO**

Figure S7 shows the impact of applying the averaging kernels, required for accurate model-satellite comparisons, to the simulated HCHO in the baseline and when the processes are combined (Exp\_CS2mLC). When the model data is interpolated onto satellite pressure levels (int, blue lines on Fig. S7), the greatest impact of the new and updated processes is found at around 800 to 900 hPa. However, once the data is multiplied by the averaging kernels (ak, red lines on Fig. S7), these differences decrease due to the low sensitivity of the satellite retrieval to the lower troposphere. Over BVOC source regions, such as the Amazon (Fig. S7b), this effect may be further exacerbated, as the upper-tropospheric decrease in HCHO is amplified. This enhancement of the high-altitude decrease combined with the low sensitivity to the low-altitude HCHO may contribute to the increase in South American bias magnitudes in DJF and MAM.

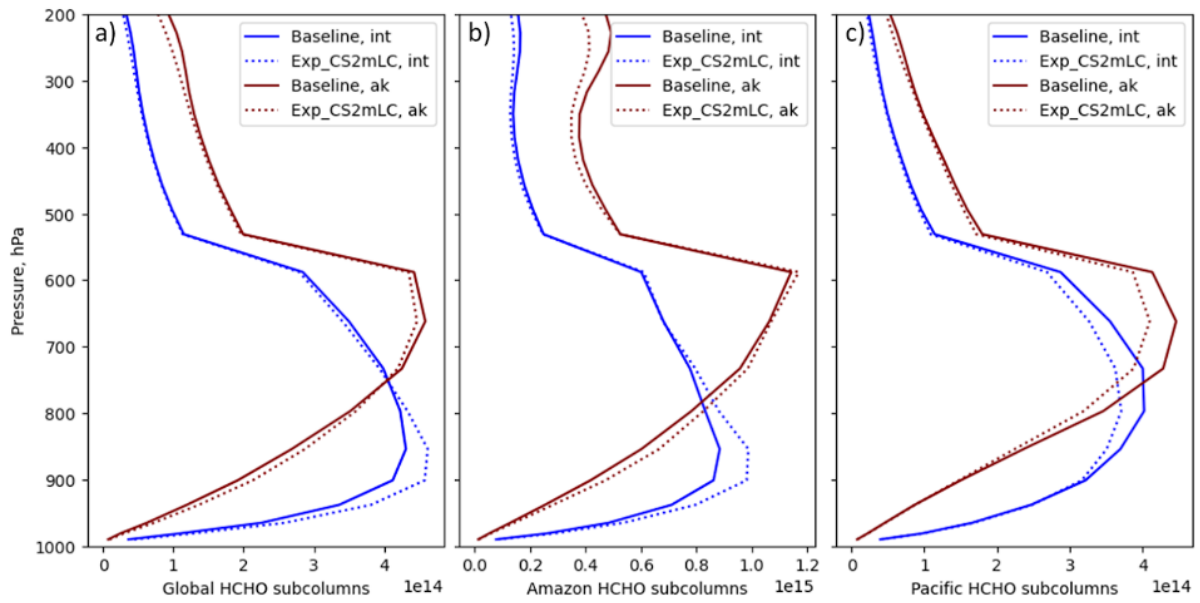

Figure S7. Impact of applying averaging kernels (ak) onto model HCHO interpolated onto satellite pressure levels (int) for the baseline (solid line) and Exp\_CS2mLC (dashed line) on the global average (a), over the Amazon (a BVOC emission region: 0 to 30°S, 60 to 90°W, b) and over the Pacific Ocean (background region: 0 to 30°S, 120 to 150°W, c).
